# Supplementary material for: Overexpression of Poplar Pyrabactin Resistance-Like Abscisic Acid Receptors Promotes Abscisic Acid Sensitivity and Drought Resistance in Transgenic Arabidopsis
Source: PubMed Central journal article supplement (PMC5167274; doi:10.1371/journal.pone.0168040), 2016-12-19
Supplement: pone.0168040.s005.pdf [file pone.0168040.s005.pdf]

**S1 Table. List of primers used in this study.**

| <b>Names</b>          | <b>Sequences (5' to 3')</b>                     | <b>Purposes</b>                    |
|-----------------------|-------------------------------------------------|------------------------------------|
| <i>PtPYRL1</i> -F     | GGGCCCGGGAT GACT GACCCAGCACAACAAGAAC            | <i>PtPYRL1</i> Gene Cloning        |
| <i>PtPYRL1</i> -R     | GGGGT CGACT TAT TTACCGT CACCGT CACGAGC          |                                    |
| <i>PtPYRL5</i> -F     | GGGGGAT CCAT GCCT GCAT CACTACAGCT CCAG          | <i>PtPYRL5</i> Gene Cloning        |
| <i>PtPYRL5</i> -R     | GGGGT CGACT CAT GAT GAT GTAGAAATCTGGGCAT        |                                    |
| <i>PtPYRL1</i> -RT-F  | CCCACCACGT CACAAT CCCACCTAG                     | <i>PtPYRL1</i> RT-PCR and qRT-PCR  |
| <i>PtPYRL1</i> -RT-R  | GCCACGCT GCAGCT CTT GATGAAG                     |                                    |
| <i>PtPYRL5</i> -RT-F  | GCCGCCAT CCCTACCACAACAAC                        | <i>PtPYRL5</i> RT-PCR and qRT-PCR  |
| <i>PtPYRL5</i> -RT-R  | CGGT GGAGACT GGT GCAT T GATGG                   |                                    |
| <i>EF1β</i> -RT-F     | GACAAGAAGGCAGCGGAGGAGAG                         | <i>EF1β</i> RT-PCR and qRT-PCR     |
| <i>EF1β</i> -RT-R     | CAAT GAGGGAAT CCACT GACACAAG                    |                                    |
| <i>ACTIN2</i> -RT-F   | ACT CT CCCGCTATGTATGT CGCC                      | <i>ACTIN2</i> RT-PCR and qRT-PCR   |
| <i>ACTIN2</i> -RT-R   | AT TTCCCGCT CTGCT GTTGTGGT                      |                                    |
| <i>PtPYRL1</i> -F     | GGGCCCGGGAT GACT GACCCAGCACAACAAGAAC            | <i>PtPYRL1</i> GFP Construction    |
| <i>PtPYRL1</i> -R2    | GGGCT CGAGT TTACCGT CACCGT CACGAGC              |                                    |
| <i>PtPYRL5</i> -F     | GGGGGAT CCAT GCCT GCAT CACTACAGCT CCAG          | <i>PtPYRL5</i> GFP Construction    |
| <i>PtPYRL5</i> -R2    | GGGCT CGAGT GAT GAT GTAGAAATCTGGGCAT TCC        |                                    |
| <i>PtABI1B</i> -F     | GGGGAAT T CAT GGAGGAGAT GTATCCGGCG              | <i>PtABI1B</i> GFP Construction    |
| <i>PtABI1B</i> -R     | GGGGGAT CCCGT GT T T TGGT T T TGA ACT TCCTTT    |                                    |
| <i>PtSnRK2.11</i> -F  | GGGGAAT T CAT GGATAGATCAGT GATGACAGT GGG        | <i>PtSnRK2.11</i> GFP Construction |
| <i>PtSnRK2.11</i> -R  | GGGGGAT CCCGCAT T GCATATACTATCTCTCCACTG         |                                    |
| <i>PtPYRL1</i> -F3    | GGGCCCGGGTAT GACT GACCCAGCACAACAAG              | <i>PtPYRL1</i> Yeast two-hybrid    |
| <i>PtPYRL1</i> -R3    | GGGGAGCT CGT TAT TTACCGT CACCGT CACGAG          |                                    |
| <i>PtPYRL5</i> -F3    | GGAAT T CAT GCCT GCAT CACTACAGCT                | <i>PtPYRL5</i> Yeast two-hybrid    |
| <i>PtPYRL5</i> -R3    | CGCGGAT CCT CAT GATGATGTAGAAATCTGGG             |                                    |
| <i>PtABI1B</i> -F     | GGGGAAT T CAT GGAGGAGAT GTATCCGGCG              | <i>PtABI1B</i> Yeast two-hybrid    |
| <i>PtABI1B</i> -R2    | GGGGGAT CCCT CAT GT T T TGGT T T TGA ACT TCCTTT |                                    |
| <i>PtSnRK2.11</i> -F  | GGGGAAT T CAT GGATAGATCAGT GATGACAGT GGG        | <i>PtSnRK2.11</i> Yeast two-hybrid |
| <i>PtSnRK2.11</i> -R2 | GGGGGAT CCCT CACAT T GCATATACTATCTCTCCACTG      |                                    |
| P35S                  | TGACGCACAAT CCCACTATC                           | General Use                        |
